# Supplementary material for: Effects of time of the day at sampling on CSF and plasma levels of Alzheimer’ disease biomarkers
Source: PubMed Central journal article supplement (PMC11193266; doi:10.1186/s13195-024-01503-x), 2024-06-22
Supplement: 13195_2024_1503_MOESM1_ESM.pdf [file 13195_2024_1503_MOESM1_ESM.pdf]

**Supplementary Table 1: Synaptic and endo-lysosomal proteins included in the MS panel**

| Protein Name                                | Gene ID | Accession | Length | Peptide           | Coverage (%) |
|---------------------------------------------|---------|-----------|--------|-------------------|--------------|
| <b>Synaptic panel</b>                       |         |           |        |                   |              |
| Amyloid Precursor Protein                   | APP     | P05067    | 770    | VESLEQEAAANER     | 1.56         |
| Neurosecretory protein VGF                  | VGF     | O15240    | 615    | NSEPQDEGELFQGVDPR | 2.76         |
|                                             |         |           |        | AYQGVAAPFPK       | 1.79         |
| Secretogranin-2                             | SCG2    | P13521    | 617    | ALEYIENLR         | 1.46         |
|                                             |         |           |        | VLEYLNQEK         | 1.46         |
| Chromogranin-A                              | CHGA    | P10645    | 457    | GLSAEPGWQAK       | 2.41         |
|                                             |         |           |        | EDSLEAGLPLQVR     | 3.17         |
| Rab GDP dissociation inhibitor alpha        | GDIA    | P31150    | 447    | QLICDPSYIPDR      | 2.68         |
| Phosphatidylethanolamine-binding protein 1  | PEPBP1  | P30086    | 187    | NRPTSISWDGLDSGK   | 8.02         |
|                                             |         |           |        | LYEQLSGK          | 4.28         |
| Syntaxin-1B                                 | STX1B   | P61266    | 288    | QHSAILAAPNPDEK    | 4.86         |
| Syntaxin-7                                  | STX7    | O15400    | 261    | EFGSLPTTPSEQR     | 4.98         |
| Complexin-2                                 | CPLX2   | Q6PUV4    | 134    | AALEQPCEGSLTRPK   | 11.19        |
| 14-3-3 protein epsilon                      | YWHAE   | P62258    | 255    | IISIEQK           | 3.14         |
| 14-3-3 protein eta                          | YWHAH   | Q04917    | 246    | AVTELNEPLSNEDR    | 5.69         |
| 14-3-3 protein zeta/delta                   | YWHAZ   | P63104    | 245    | VVSSIEQK          | 3.27         |
| Gamma-synuclein                             | SNCG    | O76070    | 127    | ENVVQSVTSVAEK     | 10.24        |
| Beta-synuclein                              | SNCB    | Q16143    | 134    | EGVVQGVASVAEK     | 9.70         |
| Neurogranin                                 | NRGN    | Q92686    | 78     | KGPGPGGPGGAGVAR   | 19.23        |
| Neuronal pentraxin receptor                 | NPTXR   | O95502    | 500    | NNYMYAR           | 1.4          |
|                                             |         |           |        | LVEAFGGATK        | 2            |
| Neuronal pentraxin-1                        | NPTX1   | Q15818    | 432    | ETVLQKK           | 1.62         |
|                                             |         |           |        | CESQSTLDPGAGEAR   | 3.47         |
|                                             |         |           |        | LTPGEVYNLATCSTK   | 3.47         |
| Neuronal pentraxin-2                        | NPTX2   | P47972    | 431    | ETVVQKK           | 1.62         |
|                                             |         |           |        | VAELEDEK          | 1.86         |
| <b>Endo-lysosomal panel</b>                 |         |           |        |                   |              |
| Cathepsin F                                 | CTSF    | Q9UBX1    | 484    | TLLCSFQVLDELGR    | 2.89         |
|                                             |         |           |        | SDVPFWAIK         | 1.86         |
| Ganglioside GM2 activator                   | GM2A    | P17900    | 193    | EVAGLWIK          | 4.15         |
|                                             |         |           |        | IESVLSSSGK        | 5.18         |
| Lysosome-associated membrane glycoprotein 2 | LAMP2   | P13473    | 410    | GILTVDELLAIR      | 2.93         |
|                                             |         |           |        | IPLNDLFR          | 1.95         |
| AP-2 complex subunit beta                   | AP2B1   | P63010    | 937    | AVWLPAVK          | 0.85         |
|                                             |         |           |        | IQPGNPNYTLCLK     | 1.39         |

**Supplementary Table 2: CSF Synaptic and endo-lysosomal biomarkers in samples collected in the evening vs morning.**

| Biomarkers                                 | Morning concentration | Evening concentration | Differences morning-evening | % Change              | F (df1, df2) <sup>a</sup> | P-value corrected (uncorrected) <sup>b</sup> |
|--------------------------------------------|-----------------------|-----------------------|-----------------------------|-----------------------|---------------------------|----------------------------------------------|
| <b>Synaptic Panel</b>                      |                       |                       |                             |                       |                           |                                              |
| Amyloid Precursor Protein                  | 3.80 (1.32)           | 4.04 (1.41)           | 0.24 (0.12 to 0.37)         | 7.06 (4.02 to 10.10)  | 15.46 (1, 37)             | <b>0.005</b> (0.0004)                        |
| Neurosecretory protein VGF                 | 3.77 (2.00)           | 3.98 (2.13)           | 0.21 (0.03 to 0.38)         | 6.38 (1.89 to 10.88)  | 5.84 (1, 37)              | <b>0.041</b> (0.021)                         |
| <i>NSEPQDEGELFQGVDPRA YQGVAAAPFPK</i>      | 7.52 (4.02)           | 8.08 (4.49)           | 0.56 (0.14 to 0.98)         | 8.45 (3.47 to 13.43)  | 7.41 (1, 37)              | <b>0.023</b> (0.010)                         |
| Secretogranin-2                            | 4.10 (1.55)           | 4.36 (1.74)           | 0.26 (0.06 to 0.47)         | 7.06 (2.65 to 11.47)  | 6.75 (1, 37)              | <b>0.03</b> (0.013)                          |
| <i>ALEYIENLR VLEYLNQEK</i>                 | 4.25 (1.66)           | 4.44 (1.83)           | 0.19 (-0.01 to 0.39)        | 5.08 (0.73 to 9.43)   | 3.74 (1, 37)              | 0.09 (0.06)                                  |
| Chromogranin-A                             | 4.44 (2.84)           | 4.68 (3.23)           | 0.24 (0.01 to 0.47)         | 5.03 (1.05 to 9.01)   | 4.47 (1, 37)              | 0.07 (0.041)                                 |
| <i>GLSAEPGWQAK EDSLEAGLPLQVR</i>           | 4.04 (2.82)           | 4.38 (2.99)           | 0.34 (0.10 to 0.57)         | 9.38 (4.97 to 13.78)  | 8.2 (1, 37)               | <b>0.02</b> (0.007)                          |
| Rab GDP dissociation inhibitor alpha       | 0.31 (0.09)           | 0.32 (0.09)           | 0.01 (-0.01 to 0.02)        | 2.67 (-1.26 to 6.60)  | 1.40 (1, 37)              | 0.31 (0.24)                                  |
| Phosphatidylethanolamine-binding protein 1 | 7.91 (2.43)           | 8.23 (2.57)           | 0.32 (0.10 to 0.54)         | 4.45 (1.71 to 7.20)   | 8.96 (1, 37)              | <b>0.02</b> (0.005)                          |
| <i>NRPTSISWDGLDSGK LYEQLSGK</i>            | 2.74 (0.77)           | 2.76 (0.73)           | 0.02 (-0.05 to 0.08)        | 1.17 (-1.24 to 3.58)  | 0.19 (1, 37)              | 0.68 (0.66)                                  |
| AP-2 complex subunit beta                  | 1.26 (0.46)           | 1.23 (0.44)           | -0.03 (-0.07 to 0.01)       | -1.60 (-4.53 to 1.32) | 1.71 (1, 37)              | 0.27 (0.20)                                  |
| <i>AVWLPAVK IQPGNPNYTLCLK</i>              | 1.61 (0.59)           | 1.58 (0.59)           | -0.03 (-0.09 to 0.04)       | -0.79 (-4.96 to 3.38) | 0.63 (1, 37)              | 0.48(0.43)                                   |
| Syntaxin-1B                                | 0.31 (0.10)           | 0.34 (0.11)           | 0.02 (0.01 to 0.03)         | 7.10 (3.38 to 10.81)  | 13.77 (1, 37)             | <b>0.005</b> (0.0007)                        |
| Syntaxin-7                                 | 0.30 (0.10)           | 0.31 (0.11)           | 0.01 (0.0002 to 0.02)       | 4.49 (0.87 to 8.12)   | 4.27 (1, 37)              | 0.07 (0.046)                                 |
| Complexin-2                                | 1.55 (0.53)           | 1.59 (0.52)           | 0.04 (-0.04 to 0.12)        | 4.17 (-0.71 to 9.05)  | 0.90 (1, 37)              | 0.42 (0.35)                                  |
| 14-3-3 epsilon                             | 0.43 (0.14)           | 0.45 (0.16)           | 0.03 (0.008 to 0.05)        | 6.62 (2.29 to 10.96)  | 8.05 (1, 37)              | <b>0.02</b> (0.007)                          |
| 14-3-3 eta                                 | 0.21 (0.07)           | 0.22 (0.07)           | 0.005 (-0.01 to 0.02)       | 6.79 (-4.25 to 17.83) | 0.58 (1, 37)              | 0.48 (0.45)                                  |
| 14-3-3 zeta/delta                          | 1.25 (0.43)           | 1.26 (0.42)           | 0.01 (-0.04 to 0.06)        | 1.77 (-2.25 to 5.80)  | 0.12 (1, 37)              | 0.74 (0.73)                                  |
| Gamma-synuclein                            | 0.60 (0.21)           | 0.64 (0.20)           | 0.04 (0.006 to 0.07)        | 8.50 (3.31 to 13.70)  | 5.82 (1, 37)              | <b>0.042</b> (0.021)                         |
| Beta-synuclein                             | 0.28 (0.10)           | 0.30 (0.12)           | 0.03 (0.007 to 0.04)        | 9.59 (3.90 to 15.28)  | 7.91 (1, 37)              | <b>0.02</b> (0.008)                          |
| Neurogranin                                | 0.60 (0.28)           | 0.66 (0.31)           | 0.06 (0.02 to 0.1)          | 11.59 (6.64 to 16.54) | 10.56 (1, 37)             | <b>0.012</b> (0.003)                         |
| Neuronal pentraxin receptor                | 6.17 (3.66)           | 6.34 (3.53)           | 0.18 (-0.10 to 0.46)        | 5.44 (1.11 to 9.76)   | 1.67 (1, 37)              | 0.27 (0.20)                                  |
| <i>NNYMYAR</i>                             | 1.22 (0.55)           | 1.35 (0.60)           | 0.12 (0.05 to 0.19)         |                       | 13.58 (1, 37)             | <b>0.005</b> (0.0007)                        |

|                                              |             |             |                       |                       |               |                       |
|----------------------------------------------|-------------|-------------|-----------------------|-----------------------|---------------|-----------------------|
| <i>LVEAFGGATK</i>                            |             |             |                       | 12.15 (6.15 to 18.15) |               |                       |
| Neuronal pentraxin-1                         |             |             |                       | 7.66 (3.28 to 12.04)  |               |                       |
| <i>ETVLQQK</i>                               | 0.67 (0.24) | 0.71 (0.26) | 0.04 (0.013 to 0.07)  | 1.46 (-3.34 to 6.26)  | 8.38 (1, 37)  | <b>0.02</b> (0.006)   |
| <i>CESQSTLDPGAGEAR</i>                       | 0.79 (0.40) | 0.81 (0.40) | 0.01 (-0.02 to 0.05)  | 6.24 (3.02 to 9.47)   | 0.63 (1, 37)  | 0.48 (0.43)           |
| <i>LTPGEVYNLATCSTK</i>                       | 1.52 (0.46) | 1.61 (0.49) | 0.09 (0.04 to 0.14)   |                       | 11.92 (1, 37) | <b>0.008</b> (0.001)  |
| Neuronal pentraxin-2                         |             |             |                       | 7.25 (-2.64 to 17.14) |               |                       |
| <i>ETVVQQK</i>                               | 0.25 (0.11) | 0.26 (0.12) | 0.009 (-0.01 to 0.03) | 5.98 (1.85 to 10.12)  | 0.84 (1, 37)  | 0.43 (0.36)           |
| <i>VAELEDEK</i>                              | 1.43 (0.59) | 1.50 (0.64) | 0.07 (0.004 to 0.14)  |                       | 4.61 (1, 37)  | 0.07 (0.039)          |
| <b>Endo-lysosomal panel</b>                  |             |             |                       |                       |               |                       |
| Cathepsin F                                  |             |             |                       | 3.97 (-0.64 to 8.58)  |               |                       |
| <i>TLLCSFQVLDELGR</i>                        | 0.47 (0.11) | 0.48 (0.11) | 0.01 (-0.01 to 0.04)  | 13.29 (4.44 to 22.14) | 1.74 (1, 37)  | 0.27 (0.20)           |
| <i>SDVPFWAIK</i>                             | 0.45 (0.13) | 0.49 (0.13) | 0.04 (0.01 to 0.07)   |                       | 7.97 (1, 37)  | <b>0.02</b> (0.008)   |
| Ganglioside GM2 activator                    |             |             |                       | 5.95 (2.94 to 8.96)   |               |                       |
| <i>EVAGLWIK</i>                              | 3.91 (1.45) | 4.11 (1.49) | 0.20 (0.01 to 0.30)   | 4.70 (2.27 to 7.13)   | 15.87 (1, 37) | <b>0.005</b> (0.0003) |
| <i>IESVLSSSGK</i>                            | 5.38 (1.95) | 5.60 (2.01) | 0.23 (0.11 to 0.35)   |                       | 14.15 (1, 37) | <b>0.005</b> (0.0006) |
| Lysosome-associated membrane glycoprotein -2 |             |             |                       | 10.76 (3.18 to 18.34) |               |                       |
| <i>GILTVDELLAIR</i>                          | 22.2 (8.73) | 23.9 (9.56) | 1.66 (0.20 to 3.11)   | 5.69 (2.03 to 9.35)   | 5.33 (1, 37)  | 0.051 (0.027)         |
| <i>IPLNDLFR</i>                              | 22.5 (9.97) | 23.4 (9.21) | 0.89 (-0.06 to 1.84)  |                       | 3.64 (1, 37)  | 0.09 (0.06)           |
| AP-2 complex subunit beta                    |             |             |                       | -1.60 (-4.53 to 1.32) |               |                       |
| <i>AVWLPAVK</i>                              | 1.26 (0.46) | 1.23 (0.44) | -0.03 (-0.07 to 0.01) | -0.79 (-4.96 to 3.38) | 1.71 (1, 37)  | 0.27 (0.20)           |
| <i>IQPGNPNYTLCLK</i>                         | 1.61 (0.59) | 1.58 (0.59) | -0.03 (-0.09 to 0.04) |                       | 0.63 (1, 37)  | 0.48 (0.43)           |

Data shown as mean (SD) or mean (95%CI) unless specified otherwise. Abbreviations: CSF, cerebrospinal fluid.

<sup>a</sup> Main effects of sampling time from repeated measures two-way ANOVA

<sup>b</sup> P-values were corrected for multiple comparison using the FDR method

**Supplementary Figure 1: CSF synaptic and endo-lysosomal biomarkers concentrations with increased levels in samples collected in the morning compared to those collected in the evening.**

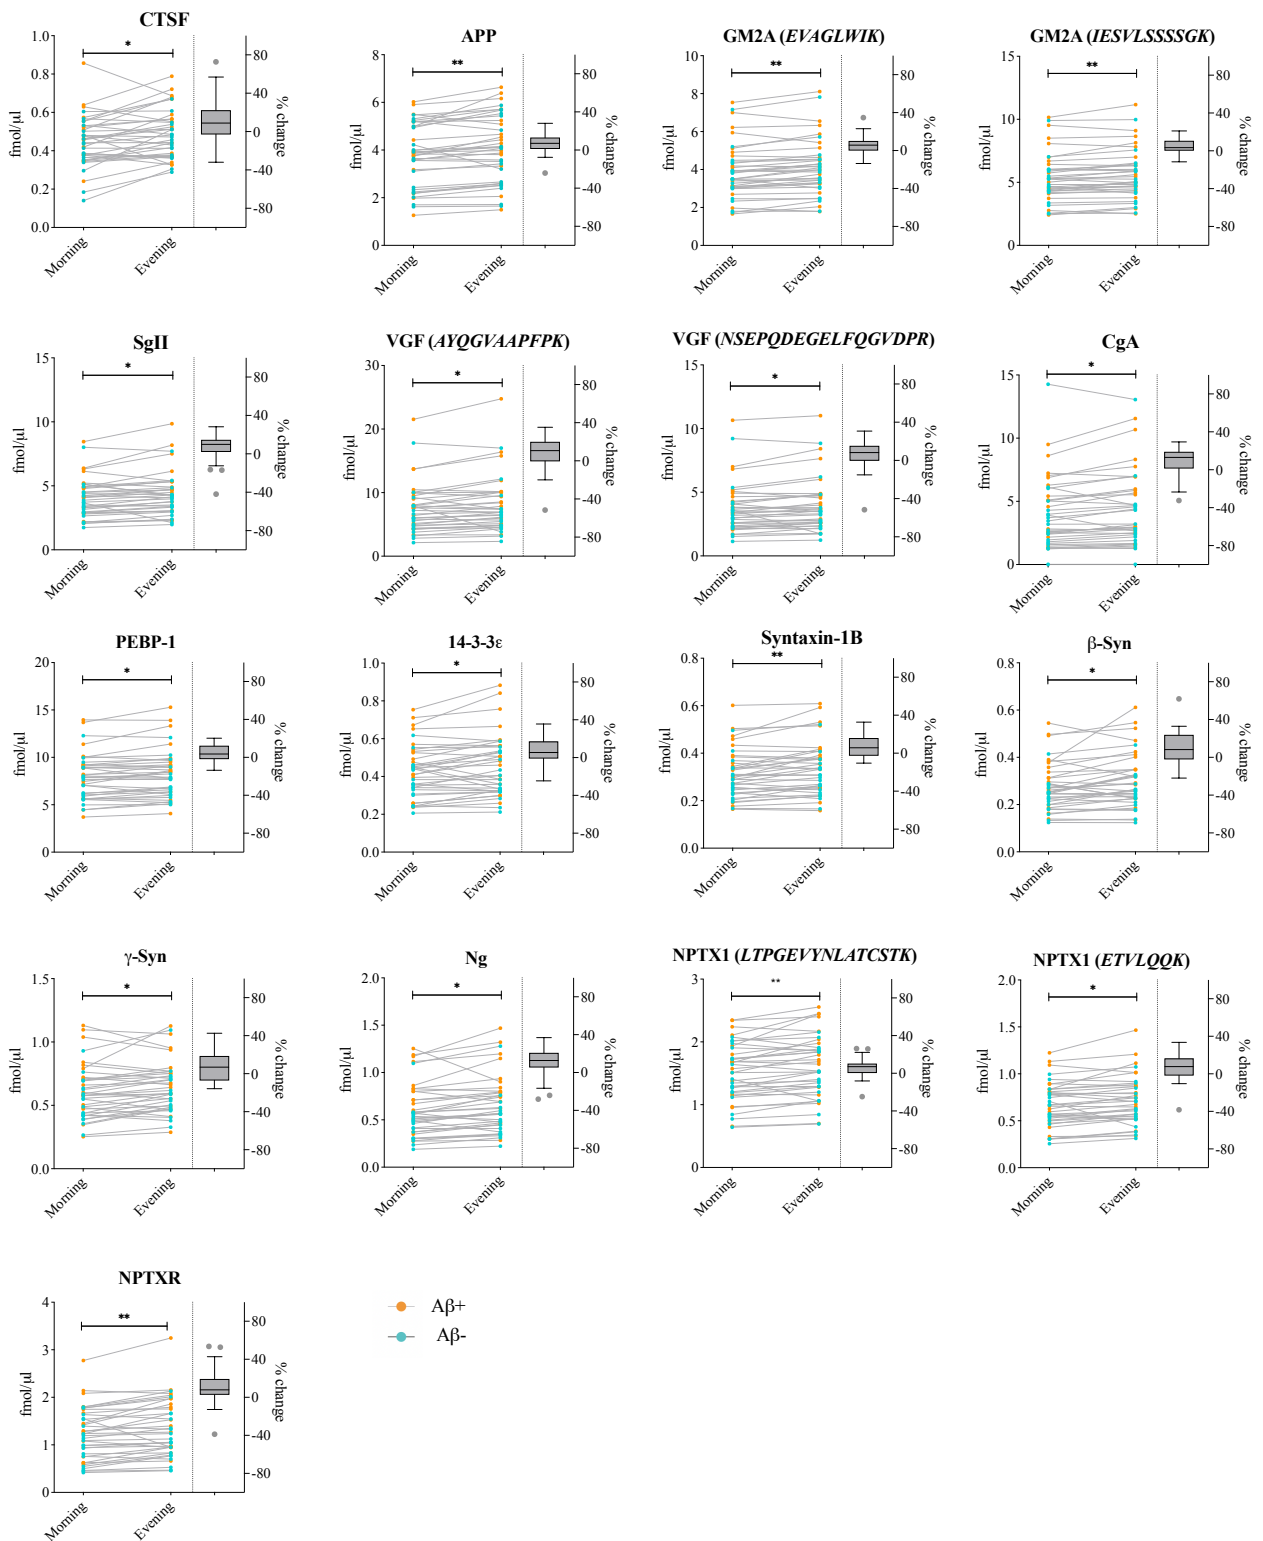

Subject specific biomarker concentration in samples collected in the morning vs evening. Average percent changes between time points are shown in box-plots plotted with the Tukey method. Blue and orange dots represent participants with negative and positive amyloid status, respectively. Asterisks represent p-values for the main effects of sampling time from repeated measures two-way ANOVA; \* p < 0.05, \*\* p < 0.01

**Supplementary Table 3: The effects of interaction between sampling time and amyloid status or sampling time and sampling order on the core AD biomarkers.** Data are F and p-values for the interaction between sampling time and amyloid status or sampling time and sampling order from repeated measures two-way ANOVA.

|                                    | <i>Amyloid Status* Sampling time</i> |                            | <i>Sampling order* Sampling time</i> |                            |
|------------------------------------|--------------------------------------|----------------------------|--------------------------------------|----------------------------|
|                                    | <b>F(df,df)</b>                      | <b>p-value<sup>a</sup></b> | <b>F(df,df)</b>                      | <b>p-value<sup>a</sup></b> |
| <i>CSF Aβ42</i>                    | 0.75 (1,36)                          | 0.39                       | 1.321 (1,36)                         | 0.26                       |
| <i>CSF Aβ40</i>                    | 1.66 (1,36)                          | 0.21                       | 0.04 (1,36)                          | 0.85                       |
| <i>CSF Aβ42/40</i>                 | 2.55 (1,36)                          | 0.12                       | 2.44 (1,36)                          | 0.13                       |
| <i>CSF P-tau217</i>                | 3.07 (1,36)                          | 0.09                       | 1.02 (1,36)                          | 0.32                       |
| <i>CSF P-tau23b<sup>a</sup></i>    | 3.70 (1,35)                          | 0.06                       | 0.11 (1,35)                          | 0.74                       |
| <i>CSF P-tau18b<sup>a</sup></i>    | 3.44 (1,35)                          | 0.07                       | 0.95 (1,35)                          | 0.34                       |
| <i>CSF GFAP</i>                    | 0.22 (1,36)                          | 0.64                       | 2.96 (1,36)                          | 0.09                       |
| <i>CSF NfL</i>                     | 0.13 (1,36)                          | 0.72                       | 0.35 (1,36)                          | 0.56                       |
| <i>CSF t-tau</i>                   | 8.13 (1,36)                          | 0.007                      | 0.06 (1,36)                          | 0.81                       |
| <i>Plasma Aβ42</i>                 | 0.02 (1,36)                          | 0.88                       | 0.15 (1,36)                          | 0.70                       |
| <i>Plasma Aβ40</i>                 | 0.59 (1,36)                          | 0.45                       | 1.02 (1,36)                          | 0.32                       |
| <i>Plasma Aβ42/40</i>              | 0.91 (1,36)                          | 0.35                       | 1.68 (1,36)                          | 0.20                       |
| <i>Plasma P-tau217</i>             | 1.30 (1,36)                          | 0.26                       | 1.17 (1,36)                          | 0.29                       |
| <i>Plasma P-tau231<sup>c</sup></i> | 0.47 (1,34)                          | 0.50                       | 0.70 (1,34)                          | 0.41                       |
| <i>Plasma P-tau181</i>             | 0.05 (1,36)                          | 0.82                       | 0.17 (1,36)                          | 0.68                       |
| <i>Plasma GFAP</i>                 | 1.28 (1,36)                          | 0.27                       | 4.08 (1,36)                          | 0.051                      |
| <i>Plasma NfL</i>                  | 0.63 (1,36)                          | 0.43                       | 1.321 (1,36)                         | 0.26                       |

Abbreviations:

CSF, cerebrospinal fluid; Aβ, amyloid beta; GFAP, glial fibrillar acidic protein; NfL, neurofilament light; t-tau, total tau; P-tau, phosphorylated tau. <sup>a</sup> Uncorrected p-values, <sup>b</sup> Data was missing for 1 participant; <sup>c</sup> Data was missing for 2 participants.

**Supplementary Figure 2: CSF biomarkers levels in samples collected in the morning and evening separated by amyloid status**

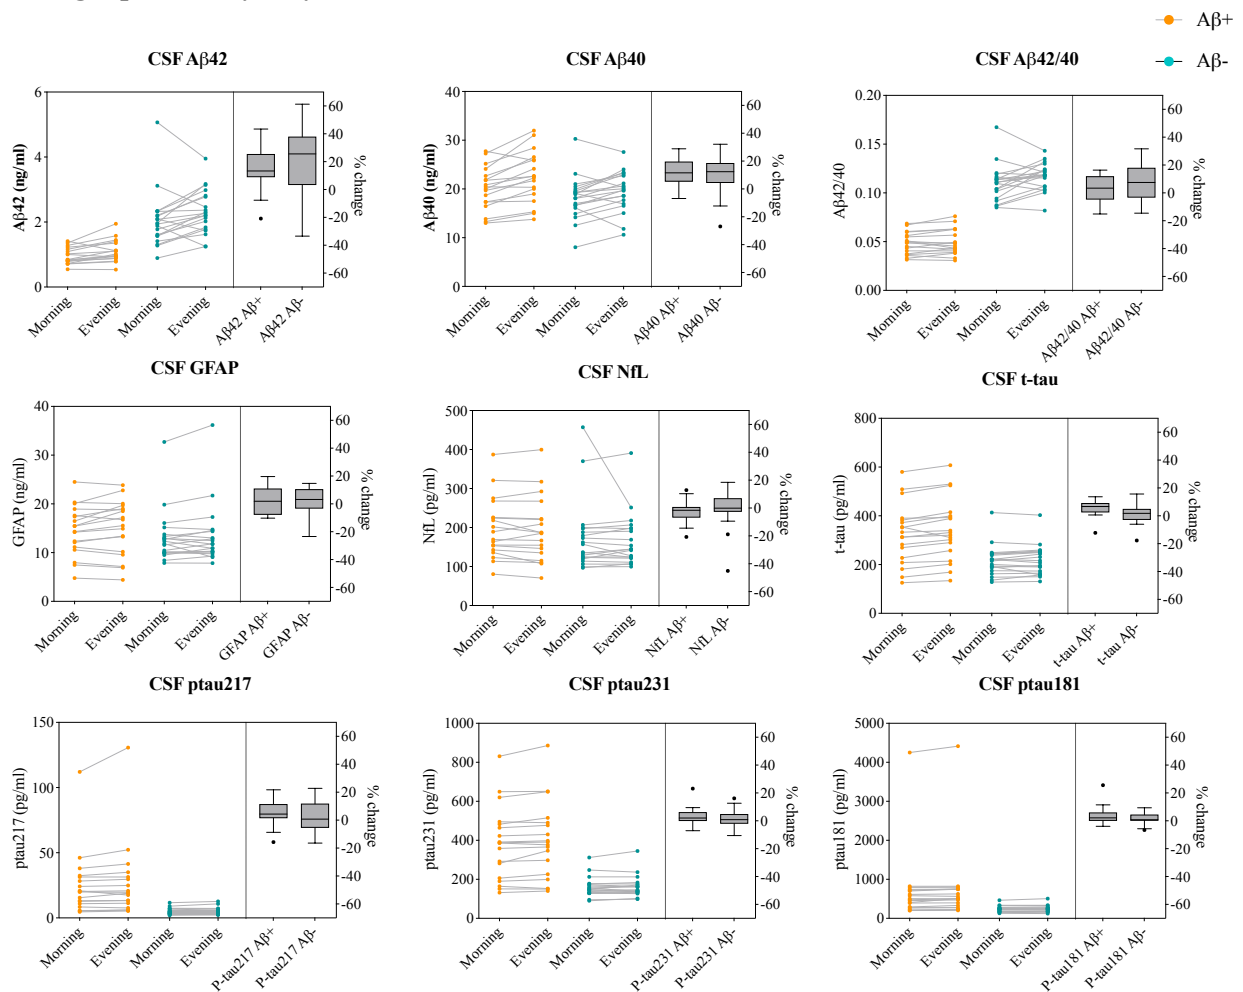

Subject specific biomarker concentration in samples collected in the morning vs evening. Average percent changes between time points are shown in box-plots plotted with the Tukey method. Blue and orange dots represent participants with negative and positive amyloid status, respectively.

### Supplementary Figure 3: Plasma biomarkers levels in samples collected in the morning and evening separated by amyloid status

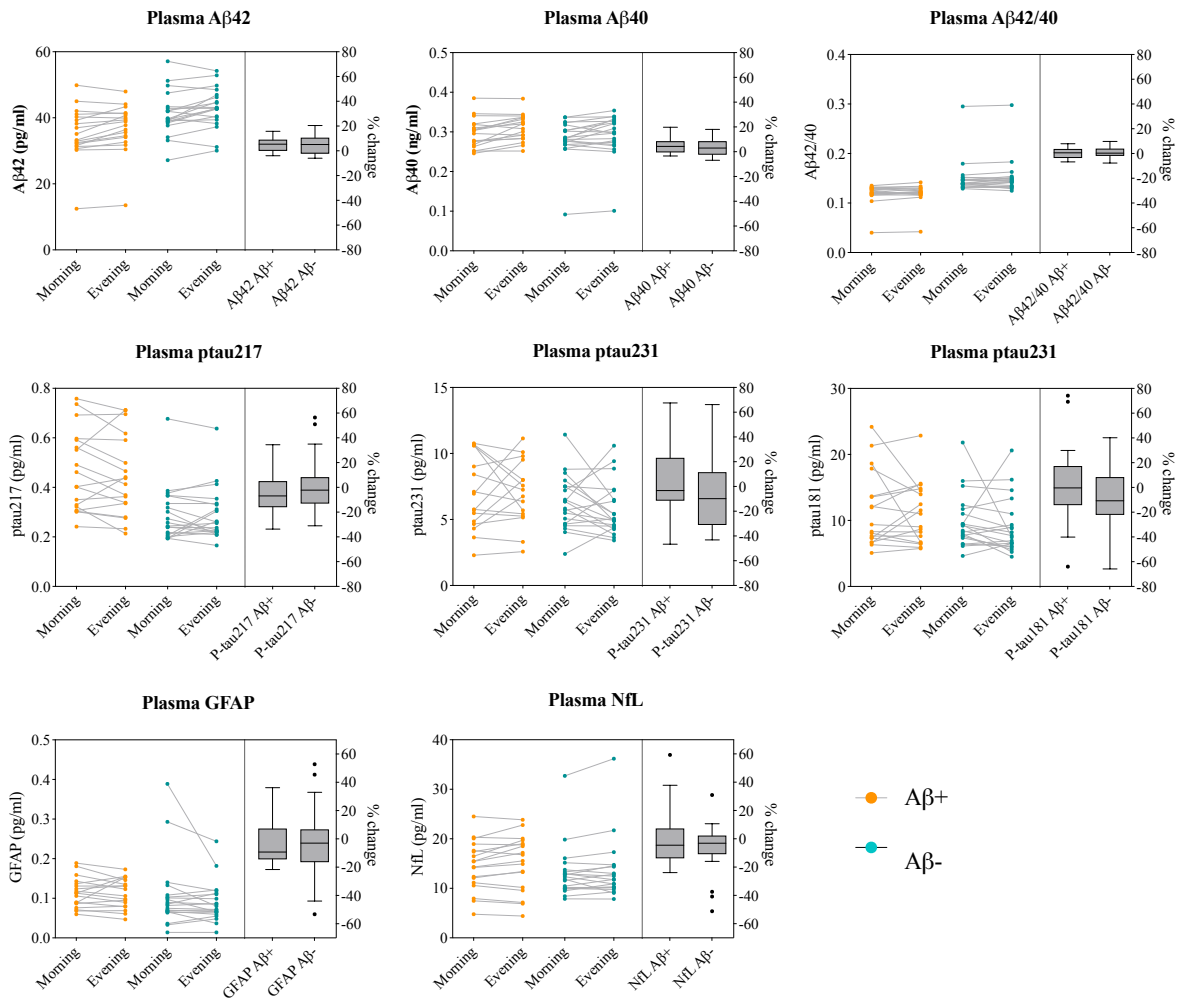

Subject specific biomarker concentration in samples collected in the morning vs evening. Average percent changes between time points are shown in box-plots plotted with the Tukey method. Blue and orange dots represent participants with negative and positive amyloid status, respectively.
